# Supplementary material for: Analysis and experimental evaluation of rate adaptation with transmit buffer information
Source: Springer Nature journal article supplement (doi:10.1186/1687-1499-2014-62), 2014-04-23
Supplement: 13638_2013_897_MOESM2_ESM.pdf [file 13638_2013_897_MOESM2_ESM.pdf]

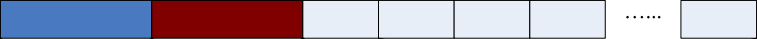

Short Preamble

Long Preamble

Header Symbol

Data Symbols
